# Supplementary material
Source: PubMed Central journal article supplement (PMC3297476)
Supplement: NIHMS354219-supplement-1_si_001.pdf [file NIHMS354219-supplement-1_si_001.pdf]

**SUPPORTING INFORMATION**

**O<sub>2</sub>-evolving Chlorite Dismutase as a Tool to  
Study O<sub>2</sub>-Utilizing Enzymes<sup>†</sup>**

*Laura M. K. Dassama,<sup>a</sup> Timothy H. Yosca,<sup>b</sup> Denise A. Conner,<sup>b</sup> Michael H. Lee,<sup>a</sup> Béatrice  
Blanc,<sup>c</sup> Bennett R. Streit,<sup>c</sup> Michael T. Green,<sup>b</sup> Jennifer L. DuBois,<sup>c,\*</sup> Carsten Krebs,<sup>a,b,\*</sup> J.  
Martin Bollinger, Jr.<sup>a,b,\*</sup>*

Departments of <sup>a</sup>Biochemistry and Molecular Biology and <sup>b</sup>Chemistry, The Pennsylvania  
State University, University Park, Pennsylvania 16802 and <sup>c</sup>Department of Chemistry and  
Biochemistry, University of Notre Dame, Notre Dame, Indiana 46556

---

**Table S1:** EPR spin quantification obtained from a range of packing factors

---

| Packing factor | Total spin (mM) | Mono Mn <sup>II</sup> (mM) | <b>X</b> (mM) | Mn <sup>IV</sup> /Fe <sup>IV</sup> (mM) |
|----------------|-----------------|----------------------------|---------------|-----------------------------------------|
| 0.50           | 2.18            | 0.60                       | 0.13          | 1.45                                    |
| 0.52           | 2.09            | 0.62                       | 0.13          | 1.34                                    |
| 0.54           | 2.02            | 0.66                       | 0.12          | 1.24                                    |
| 0.56           | 1.95            | 0.67                       | 0.12          | 1.16                                    |
| 0.58           | 1.88            | 0.69                       | 0.11          | 1.07                                    |
| 0.60           | 1.82            | 0.72                       | 0.11          | 0.99                                    |

---

**Table S2:** Spin-Hamiltonian Parameters of the Mn<sup>IV</sup>/Fe<sup>IV</sup> intermediate in *Ct* RNR-β<sub>2</sub>

| Parameter           | Fe <sup>IV</sup> site                        | Mn <sup>IV</sup> site |
|---------------------|----------------------------------------------|-----------------------|
| <b>A</b> (MHz)      | -54.5, -59.5, -43.5<br>(-55.9, -59.3, -40.5) | 247, 216, 243         |
| $\delta$ (mm/s)     | 0.19 (0.17)                                  |                       |
| $\Delta E_Q$ (mm/s) | -0.62 (-0.75)                                |                       |
| $\eta$              | -9 (-10)                                     |                       |

## FIGURES, CAPTIONS, AND LEGENDS

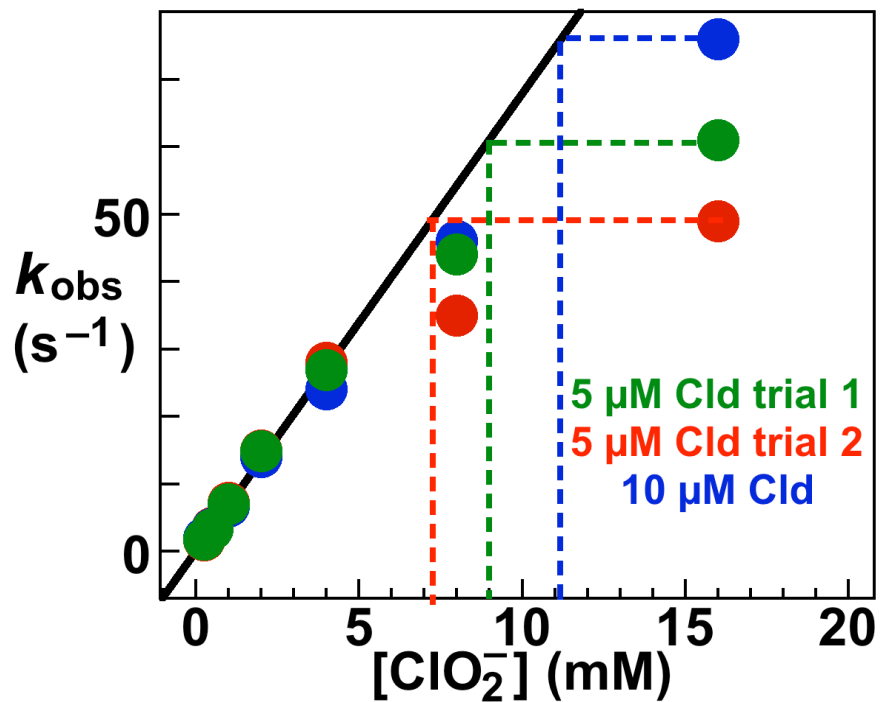

**Figure S1.** Observed first-order rate-constant for  $\text{Mn}^{\text{IV}}/\text{Fe}^{\text{IV}}$  intermediate formation as a function of  $\text{ClO}_2^-$  from three independent experiments employing two different concentrations of Cld. The onset of the deviation from the first-order dependence on  $[\text{ClO}_2^-]$  occurs at a greater value of  $[\text{ClO}_2^-]$  with the greater  $[\text{Cld}]$  (10  $\mu\text{M}$ ), suggesting that the deviation is associated with inefficiency or inactivation of the Cld catalyst at high concentrations of  $\text{ClO}_2^-$ .

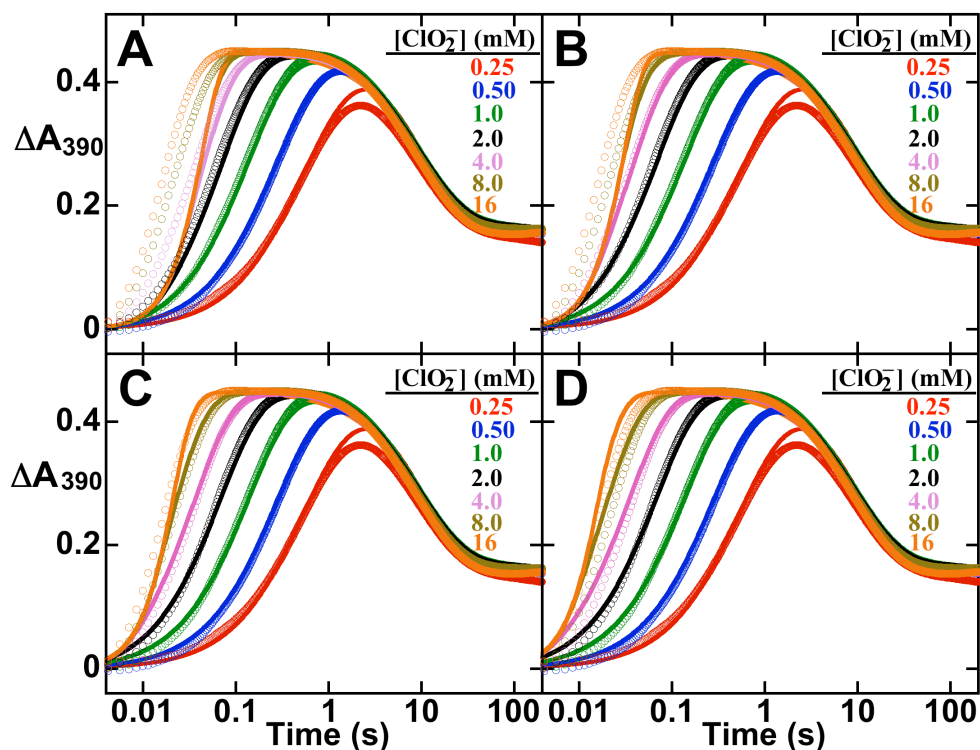

**Figure S2.** Kinetic simulations to assess the  $k_{\text{cat}}$  of ClD under the reaction conditions described in Fig. 1B. The simplest two-step kinetic model for ClD, in which  $\text{ClO}_2^-$  binds non-covalently with a  $K_D$  of 215  $\mu\text{M}$  [the reported  $K_M$  of the reaction (1)] and is converted in a single step to free  $\text{O}_2$  and  $\text{Cl}^-$  with a phenomenological rate constant of  $k_{\text{cat}}$ , was assumed, and  $k_{\text{cat}}$  was varied. Simulated traces with the same range of  $[\text{ClO}_2^-]$  used in Fig. 1B and with  $k_{\text{cat}}$  values  $\leq 60,000 \text{ s}^{-1}$  (A and B) give noticeably poor agreement with the data for  $[\text{ClO}_2^-] > 4 \text{ mM}$ . An assumed  $k_{\text{cat}}$  of  $120,000 \text{ s}^{-1}$  (C) gives much better agreement between the simulated traces and the data, while a value of  $200,000 \text{ s}^{-1}$  (D) is obviously too high. This analysis suggests that the true  $k_{\text{cat}}$  under these conditions is  $\sim 120,000 \text{ s}^{-1}$ , in agreement with published results (2).

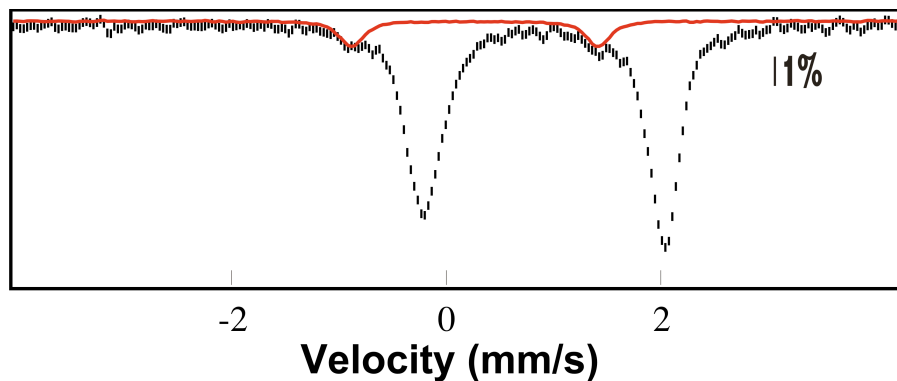

**Figure S3.** Mössbauer spectrum (4.2 K/53 mT parallel field) of a freeze-quench sample prepared by mixing a solution of 10 mM Fe<sup>II</sup>-Mb (2.5 mM <sup>57</sup>Fe-Mb and 7.5 mM <sup>56</sup>Fe-Mb) with 0.25 equivalent volumes of a solution of 100 mM ClO<sub>2</sub><sup>-</sup> and freeze-quenching quenched after 15 ms. The spectrum has a  $7 \pm 3\%$  contribution from oxy-Mb (shown in red).

## REFERENCES

1. Streit, B. R., and DuBois, J. L. (2008) Chemical and steady-state kinetic analyses of a heterologously expressed heme dependent chlorite dismutase, *Biochemistry* 47, 5271-5280.
2. Streit, B. R., Blanc, B., Lukat-Rodgers, G. S., Rodgers, K. R., and DuBois, J. L. (2010) How Active-Site Protonation State Influences the Reactivity and Ligation of the Heme in Chlorite Dismutase, *J. Am. Chem. Soc.* 132, 5711-5724.
